# Supplementary material
Source: PubMed Central journal article supplement (PMC7954788)
Supplement: NIHMS1625643-supplement-1.pdf [file NIHMS1625643-supplement-1.pdf]

## Supplemental Figures

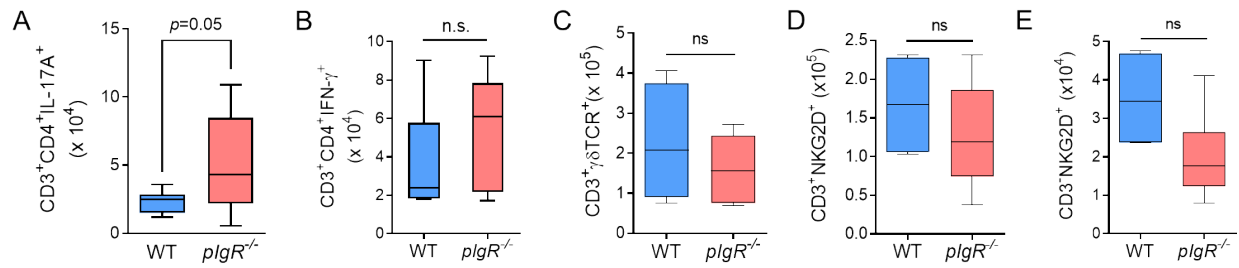Supplemental Figure 1. Quantification of IL-17A<sup>+</sup> and IFN-γ<sup>+</sup> CD4<sup>+</sup> cells in the lungs of

aged WT and *pIgR*<sup>-/-</sup> mice. (A) Numbers of IL-17A<sup>+</sup> CD4<sup>+</sup> cells in lungs of 18-month-old WT and *pIgR*<sup>-/-</sup> mice as determined by flow cytometry. (B) Numbers of IFN-γ<sup>+</sup> CD4<sup>+</sup> cells in lungs of 12-month-old WT and *pIgR*<sup>-/-</sup> mice as determined by flow cytometry. (C-E) Numbers of γδ T cells (CD3<sup>+</sup>γδTCR<sup>+</sup>), NK-T cells (CD3<sup>+</sup>NKG2D<sup>+</sup>), and NK cells (CD3<sup>+</sup>NKG2D<sup>+</sup>) in lungs of 18-month-old WT and *pIgR*<sup>-/-</sup> mice as determined by flow cytometry. n.s. = not significant,  $p > 0.05$  by *t*-test.

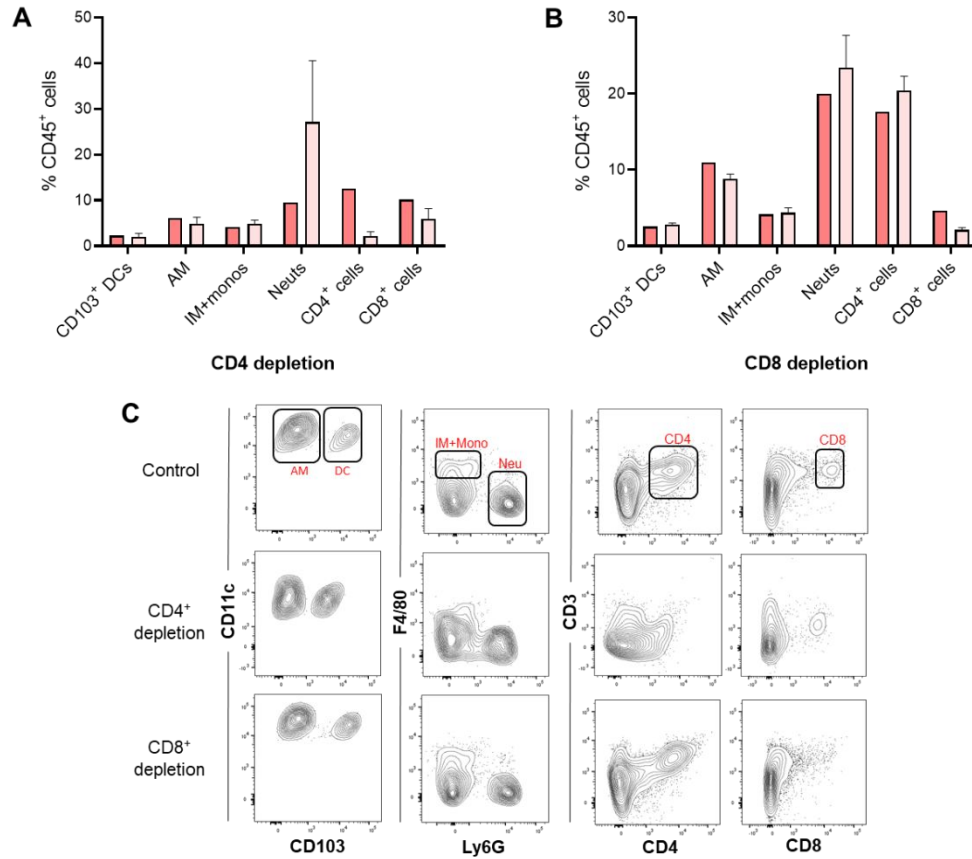

**Supplemental Figure 2. Effects of CD4 or CD8 depletion on other immune cell types in the lung.** Red denotes *pIgR*<sup>-/-</sup> control mice and pink denotes *pIgR*<sup>-/-</sup> mice treated with CD4 or CD8-depleting antibodies. (A to B) % immune/inflammatory cells among CD45<sup>+</sup> cells in the lungs of *pIgR*<sup>-/-</sup> mice treated with CD4 or CD8-depleting antibodies for 1 month or no antibody. *n*=2-3 mice/group. (C) Gating strategy for A to B, including examples of flow cytometry plots in an untreated *pIgR*<sup>-/-</sup> mouse (top row), a *pIgR*<sup>-/-</sup> mouse treated with a CD8-depleting antibody for one month (middle row), and a *pIgR*<sup>-/-</sup> mouse treated with a CD4 lymphocyte-depleting antibody for one month (bottom row). CD45<sup>+</sup> cells were the parent population for all plots. AM=alveolar macrophages, DC=dendritic cells, IM=interstitial macrophages, Monos=monocytes, Neu=neutrophils.

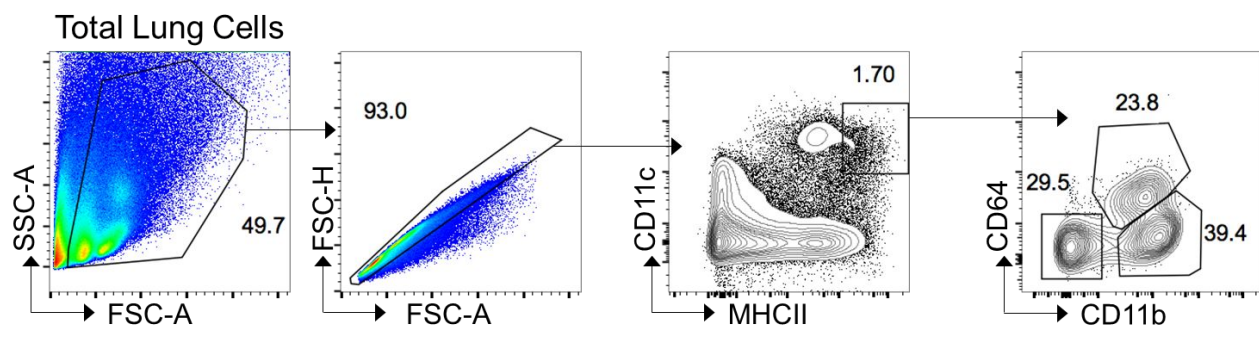

**Supplemental Figure 3. Back-gating for moDC/cDC1/cDC2 flow cytometry plots.** Gating strategy for identification of moDCs, cDC1, and cDC2 cells from total lung cells used in **Figure 4-6.**

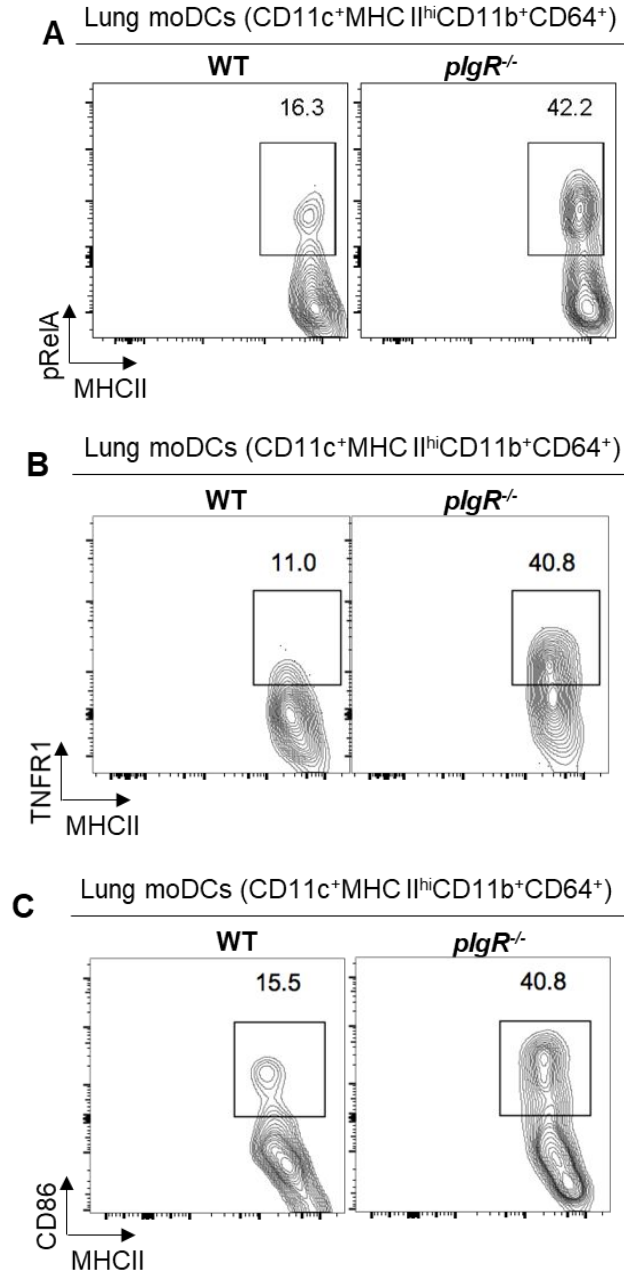

**Supplemental Figure 4. Representative flow cytometry plots for moDC activation markers.**

These flow cytometry plots correspond to data shown in **Figure 4C**. (A to C) Representative flow cytometry plots for pRelA<sup>+</sup>, TNFR1<sup>+</sup>, and CD86<sup>+</sup> cells in 18-month-old WT and *pIgR*<sup>-/-</sup> mice.

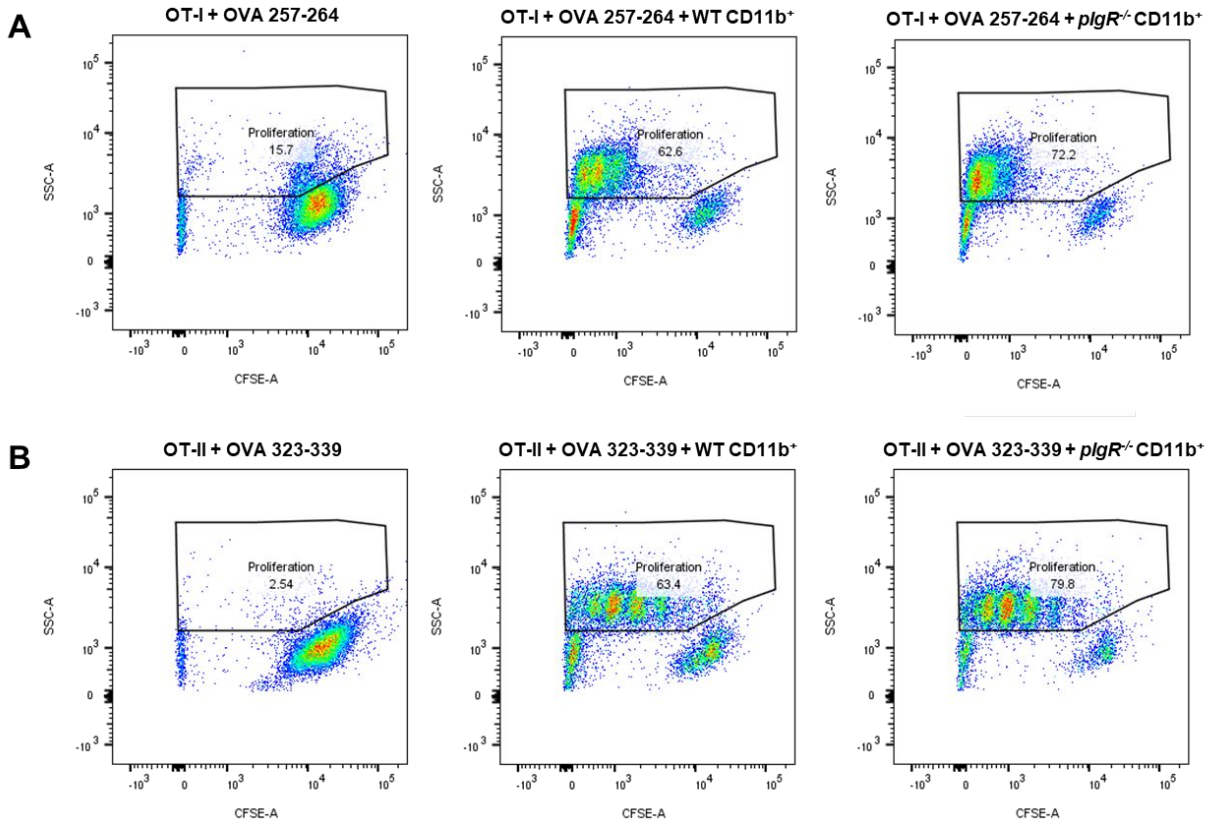

**Supplemental Figure 5. Representative flow cytometry plots for mixed lymphocyte reaction experiments.** These flow cytometry plots correspond to data shown in **Figure 4D and E.** **(A)** Representative flow cytometry plots showing OT-I proliferation by CFSE staining when cells were incubated in the presence of OVA 257-264 (left plot), OVA 257-264 and CD11b<sup>+</sup> cells from 18-month-old WT mice (center panel), and OVA 257-264 and CD11b<sup>+</sup> cells from 18-month-old *pIgR*<sup>-/-</sup> mice. **(B)** Representative flow cytometry plots showing OT-II proliferation by CFSE staining when cells were incubated in the presence of OVA323-339 (left plot), OVA323-339 and CD11b<sup>+</sup> cells from 18-month-old WT mice (center panel), and OVA323-339 and CD11b<sup>+</sup> cells from 18-month-old *pIgR*<sup>-/-</sup> mice.

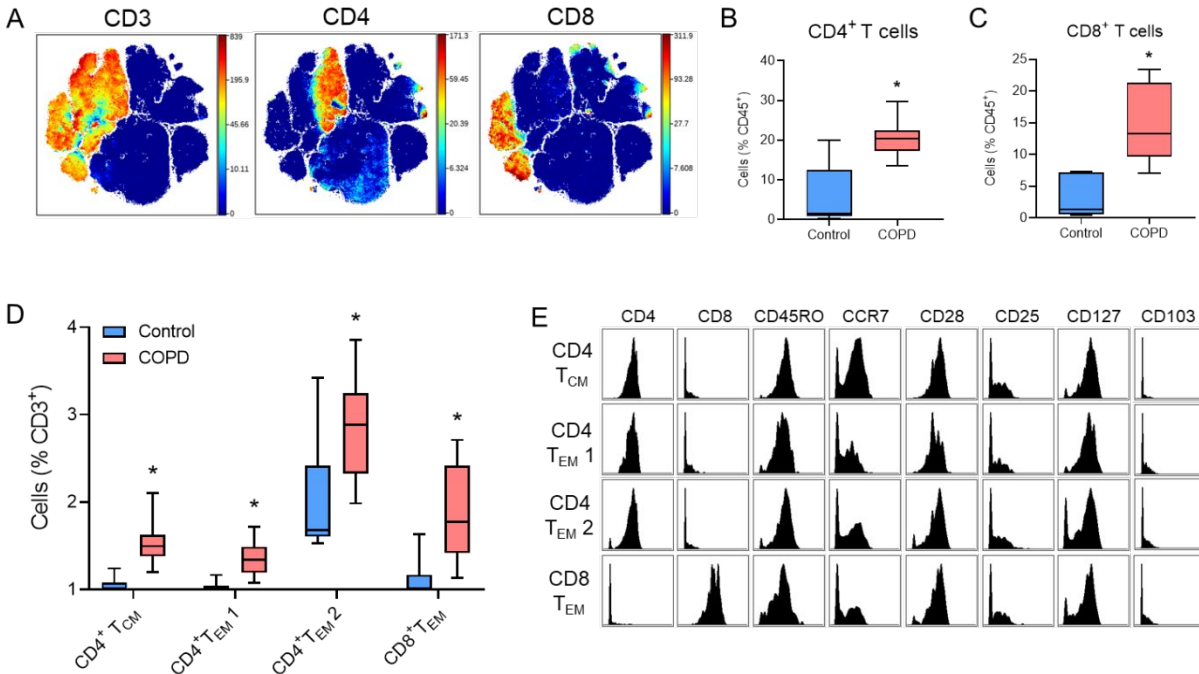

**Supplemental Figure 6. Increased effector memory CD4<sup>+</sup> and CD8<sup>+</sup> lymphocytes in the lungs of COPD patients.** Single-cell suspensions were prepared from the lungs of 12 COPD patients and 6 controls without chronic respiratory disease and analyzed by mass cytometry. **(A)** Expression of CD3, CD4, and CD8 in viSNE clusters generated from live, single, CD45<sup>+</sup> cells from all patients (total of 400,000 cells. **(B to C)**, Percentage of CD4<sup>+</sup> and CD8<sup>+</sup> cells among CD45<sup>+</sup> cells in COPD and non-diseased control lungs. **(D)** Abundance (percentage of CD3<sup>+</sup> cells) of the 4 lymphocyte clusters enriched in COPD lungs relative to controls. **(E)** Histograms of lymphocyte markers according to differentially abundant lymphocyte clusters as shown in **D**. **(B)**, \* =  $p < 0.001$  compared to control lungs (Mann-Whitney test);  $n = 12$  COPD lungs and 6 control lungs. **(C)**, \* =  $p < 0.001$  compared to control lungs ( $t$ -test);  $n = 12$  COPD lungs and 6 control lungs. **(D)** \* =  $p < 0.05$  compared to control lungs (Mann-Whitney test).

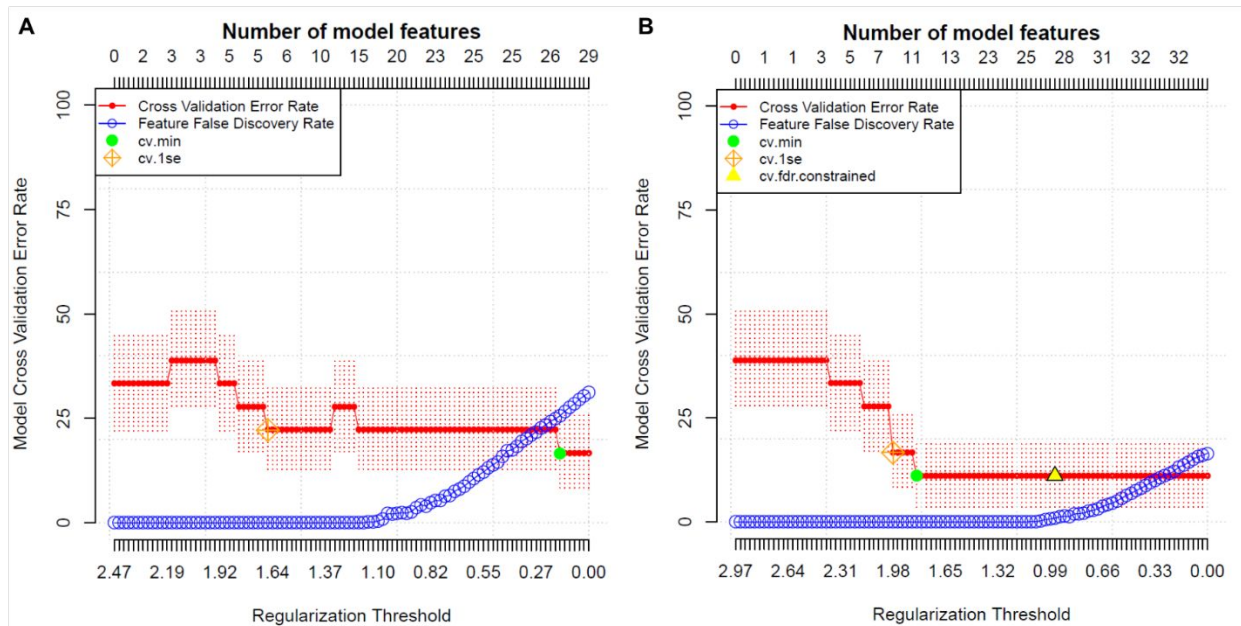

**Supplemental Figure 7. Performance characteristics of Citrus models.** These graphs correspond to the Citrus analyses described in **Figure 7-8**. The cross-validation error rate describes the ability of the Citrus model generated from all samples to describe behavior of a subset of samples. The cross-validation rate does not drop to zero because of unequal samples size between COPD and control samples. *cv.min* describes the model with the lowest cross-validation error rate and represents the minimum number of features needed to describe differential abundance in each cluster between COPD and control samples. *cv.1se* describes the model with the lowest cross-validation error rate within 1 standard error and also represents the minimum number of features needed to describe the differences between COPD and control samples. *cv.fdr.constrained* describes all of the different features below the false discovery rate (1%) and represents all the features required to describe differential abundance in each cluster between COPD and control samples.

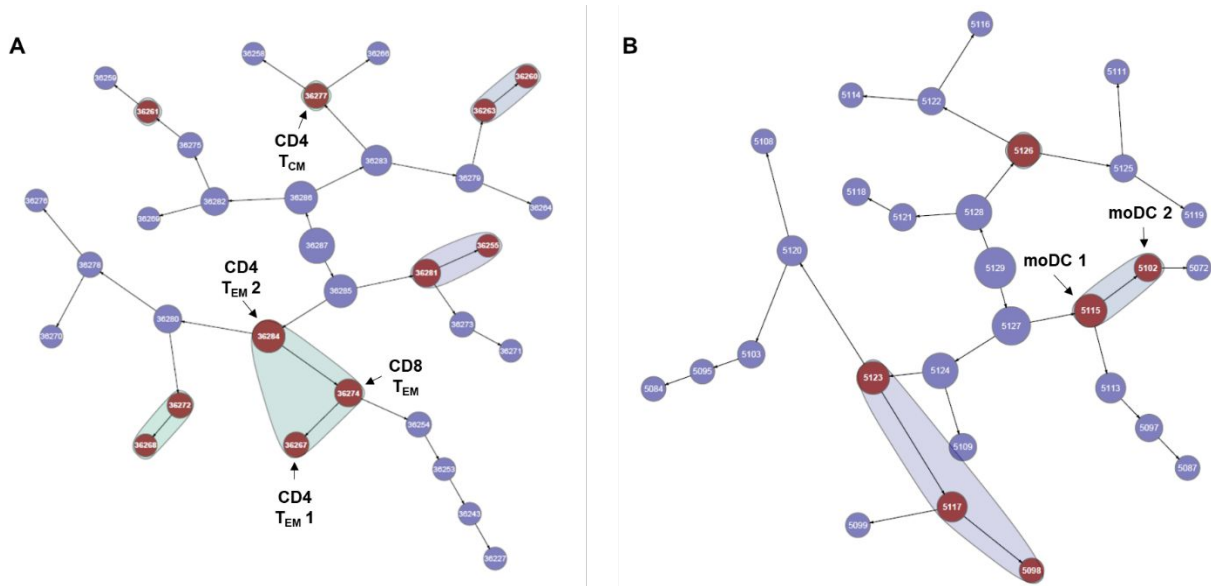

**Supplemental Figure 8. Citrus analyses for T lymphocyte and myeloid cell populations.** In this visualization, each cluster generated by Citrus is depicted by a single node, with the size of the node indicating the proportional abundance of the cluster and red nodes indicating differentially abundant clusters between COPD and control lungs. **(A)** Citrus analysis showing cell clusters within the lymphocyte ( $CD3^+$ ) viSNE islands. The labeled clusters were increased in COPD lungs. **(B)** Citrus analysis showing cell clusters within the myeloid cell ( $CD11b^+CD11c^+HLA-DR^+$ ) viSNE island. The labeled clusters were increased in COPD lungs.



**Supplemental Table 1.** Demographic and clinical characteristics of patients evaluated in Figure 1.

|                                       | <b>Lifelong non-smokers<br/>(n=8)</b> | <b>COPD<br/>(n=12)</b> |
|---------------------------------------|---------------------------------------|------------------------|
| <b>Age – yr.</b>                      |                                       |                        |
| Mean                                  | 61.9                                  | 56.7                   |
| Range                                 | 55-69                                 | 44-65                  |
| <b>Sex – No. (%)</b>                  |                                       |                        |
| Male                                  | 5 (62.5)                              | 6 (50)                 |
| Female                                | 3 (37.5)                              | 6 (50)                 |
| <b>Race/ethnicity No. (%)</b>         |                                       |                        |
| White non-Hispanic                    | -                                     | 11 (92.7)              |
| Black                                 | -                                     | 1 (8.3)                |
| <b>FEV1/FVC ratio</b>                 |                                       |                        |
| Mean                                  | 92.5                                  | 27.2                   |
| Range                                 | 61-117                                | 21-42                  |
| <b>FEV1, % predicted</b>              |                                       |                        |
| Mean                                  | 101                                   | 20.9                   |
| Range                                 | 88-109                                | 12-29                  |
| <b>FVC, % predicted</b>               |                                       |                        |
| Mean                                  | 79                                    | 63                     |
| Range                                 | 74-84                                 | 37-93                  |
| <b>Tobacco history (pack-years)</b>   |                                       |                        |
| Mean                                  | -                                     | 38.8                   |
| Range                                 | -                                     | 21-75                  |
| <b>Alpha-1-antitrypsin deficiency</b> |                                       |                        |
| No. (%)                               | -                                     | 0 (0)                  |

**Supplemental Table 2.** Demographic and clinical characteristics of patients evaluated in Figure 7 and 8.

|                                       | <b>Control (n=6)</b> | <b>COPD (n=12)</b> |
|---------------------------------------|----------------------|--------------------|
| <b>Age – yr.</b>                      |                      |                    |
| Mean                                  | 35.5                 | 57.8               |
| Range                                 | 14-61                | 46-66              |
| <b>Sex – No. (%)</b>                  |                      |                    |
| Male                                  | 1 (17)               | 6 (50)             |
| Female                                | 3 (50)               | 6 (50)             |
| Unknown                               | 2 (33)               | 0 (0)              |
| <b>Race/ethnicity</b>                 |                      |                    |
| White non-Hispanic                    | 3 (50)               | 12 (100)           |
| African American                      | 2 (33)               | 0 (0)              |
| Hispanic/Latino                       | 1 (17)               | 0 (0)              |
| <b>FEV1/FVC ratio</b>                 |                      |                    |
| Mean                                  | -                    | 27.8               |
| Range                                 | -                    | 21-34              |
| <b>FEV1, % predicted</b>              |                      |                    |
| Mean                                  | -                    | 16.5               |
| Range                                 | -                    | 10-25              |
| <b>FVC, % predicted</b>               |                      |                    |
| Mean                                  | -                    | 46.1               |
| Range                                 | -                    | 36-62              |
| <b>Tobacco history (pack-years)</b>   |                      |                    |
| Mean                                  | -                    | 45.7               |
| Range                                 | 0-30                 | 10-90              |
| <b>Current smoker</b>                 |                      |                    |
| No. (%)                               | 4 (66)               | 0 (0)              |
| <b>Alpha-1-antitrypsin deficiency</b> |                      |                    |
| No. (%)                               | -                    | 3 (25)             |

**Supplemental Table 3.** List of flow cytometry antibodies.

| <b>Figure</b> | <b>Marker</b> | <b>Fluorophore</b>   | <b>Clone</b> |
|---------------|---------------|----------------------|--------------|
| Fig. 2        | CD45          | FITC                 | 30-F11       |
| Fig. 2        | CD3           | AF 700               | 17A2         |
| Fig. 2        | CD8           | BV 710               | 53-6.7       |
| Fig. 2        | CD4           | BV 510               | RM4-5        |
| Fig. 2        | CD19          | BV 570               | 6D5          |
| Fig. 2        | CD11c         | APC                  | N418         |
| Fig. 2        | CD103         | PE                   | 2E7          |
| Fig. 2        | F4/80         | APC-Cy7              | BM8          |
| Fig. 2        | Ly6G          | PE-Cy7               | IA8          |
| Fig. 5, 6     | CD3           | APC/Cy7              | 145-2C11     |
| Fig. 5, 6     | CD4           | PE/Cy7               | GK1.5        |
| Fig. 5, 6     | CD8           | APC                  | 53-6.7       |
| Fig. 4, 5, 6  | CD11c         | APC/Cy7              | N418         |
| Fig. 4, 5, 6  | CD11b         | PE/Cy7               | M1/70        |
| Fig. 4, 5, 6  | MHCII         | Brilliant violet 421 | M5/114/15.2  |
| Fig. 4, 5, 6  | CD64          | PerCP/Cy5.5          | X54-5/7.1    |
| Fig. 4, 5, 6  | pRelA         | APC                  | 93H1         |
| Fig. 4, 5, 6  | TNFR1         | PE                   | HM104        |
| Fig. 4, 5, 6  | CD86          | APC/Cy7              | GL-1         |
| Fig. S1       | Live/dead     | Ghost UV 450         |              |
| Fig. S1       | CD45          | Alexa Fluor 700      | 30-F11       |
| Fig. S1       | CD3           | BV786                | 145-2C11     |
| Fig. S1       | CD4           | PE-Cy5               | 129.19       |
| Fig. S1       | IL-17A        | PE-Cy7               | eBio17B7     |

**Supplemental Table 4.** List of mass cytometry antibodies.

| <b>Figure</b> | <b>Marker</b>           | <b>Metal conjugate</b> |
|---------------|-------------------------|------------------------|
| Fig. 7 and 8  | CD45                    | 89Y                    |
| Fig. 7 and 8  | CD19                    | 142Nd                  |
| Fig. 7 and 8  | CD11b                   | 144Nd                  |
| Fig. 7 and 8  | CD4                     | 145Nd                  |
| Fig. 7 and 8  | CD8a                    | 146Nd                  |
| Fig. 7 and 8  | CD11c                   | 147Sm                  |
| Fig. 7 and 8  | CD16                    | 148Nd                  |
| Fig. 7 and 8  | CD127                   | 149Sm                  |
| Fig. 7 and 8  | CD86                    | 150Nd                  |
| Fig. 7 and 8  | HLA-DR                  | 151Eu                  |
| Fig. 7 and 8  | CD36                    | 152Sm                  |
| Fig. 7 and 8  | CCR4                    | 153Eu                  |
| Fig. 7 and 8  | CD163                   | 154Sm                  |
| Fig. 7 and 8  | CD169                   | 158Gd                  |
| Fig. 7 and 8  | FOXP3                   | 159Tb                  |
| Fig. 7 and 8  | CD14                    | 160Gd                  |
| Fig. 7 and 8  | CD103                   | 161Dy                  |
| Fig. 7 and 8  | CD28APC<br>+anti-APC    | 162Dy                  |
| Fig. 7 and 8  | CD34                    | 163Dy                  |
| Fig. 7 and 8  | CD45RO                  | 164Dy                  |
| Fig. 7 and 8  | CD64-PE + anti-<br>PE   | 165Ho                  |
| Fig. 7 and 8  | CD24                    | 166Er                  |
| Fig. 7 and 8  | CCR7                    | 167Er                  |
| Fig. 7 and 8  | CD206                   | 168Er                  |
| Fig. 7 and 8  | CD25                    | 169Tm                  |
| Fig. 7 and 8  | CD3                     | 170Er                  |
| Fig. 7 and 8  | CD68                    | 171Yb                  |
| Fig. 7 and 8  | CD38                    | 172Yb                  |
| Fig. 7 and 8  | CCR2 FITC+<br>anti-FITC | 174Yb                  |

|              |               |         |
|--------------|---------------|---------|
| Fig. 7 and 8 | CD56          | 176Yb   |
| Fig. 7 and 8 | Nuc acid --Ir | 191/193 |
| Fig. 7 and 8 | Cisplatin     | 198Pt   |
